# Supplementary material for: Presence of Fermentable Oligo-, Di-, Monosaccharides, and Polyols (FODMAPs) in commonly eaten foods: extension of a database to indicate dietary FODMAP content and calculation of intake in the general population from food diary data
Source: PubMed Central journal article supplement (PMC7499970; doi:10.1186/s40795-020-00374-3), 2020-09-18
Supplement: 40795_2020_374_MOESM1_ESM.pdf [file 40795_2020_374_MOESM1_ESM.pdf]

## Supplements

**Supplementary Table 1. FODMAP content of food items eaten in the largest quantity**, presented as mean intake of the estimated four-day food records (n=117). Added FODMAP values for each FODMAP given in g/day with reference in parenthesis. The ten food items contributing the most to the intake of each FODMAP are listed, a few food items containing several types of FODMAPs are listed more than once.

| Food items      | Mean intake of food item g/day | Fructose (g/100g) | Glucose (g/100 g) | Fructose in excess of glucose (g/100 g) | Fructan (g/100g) | Lactose (g/100g) | GOS (g/100 g) | Polyol (g/100 g) | Total FODMAP content (g/100 g) | Analytical method                            | Comments                                                                                                          |
|-----------------|--------------------------------|-------------------|-------------------|-----------------------------------------|------------------|------------------|---------------|------------------|--------------------------------|----------------------------------------------|-------------------------------------------------------------------------------------------------------------------|
| <b>Fructose</b> |                                |                   |                   |                                         |                  |                  |               |                  |                                |                                              |                                                                                                                   |
| Orange juice    | 94                             | 2.8 (1)           | 3.4 (1)           | 0                                       | 0                | 0                | 0             | 0                | 0                              | GC                                           |                                                                                                                   |
| Potato          | 38                             | 0.4 (2)           | 0.4 (2)           | 0                                       | 0                | 0                | 0             | 0                | 0                              | GC                                           |                                                                                                                   |
| Banana          | 35                             | 2.6 (3, 4)        | 4.4 (4)           | 0                                       | 0.5 (5)          | 0                | 0             | 0                | 0.5                            | Enzymes, HPLC with ELSD, ion Chromatographic | Mean value ripe and firm                                                                                          |
| Cola drinks     | 33                             | 3.4 (6)           | 3.5 (6)           | 0                                       | 0                | 0                | 0             | 0                | 0                              |                                              | McCance & Widdowson's The composition of foods. 1994                                                              |
| Tomato          | 27                             | 1.4 (2)           | 1.4 (2)           | 0                                       | 0.09 (4)         | 0                | 0             | 0                | 0.09                           | GC, HPLC with ELSD                           | Fructose, mean value of cherry tomato, tomato cultivated in mars, tomatoes cultivated in august. Fructan, mean of |

|                                            |    |             |             |      |          |   |          |          |      |                                              |                                                          |
|--------------------------------------------|----|-------------|-------------|------|----------|---|----------|----------|------|----------------------------------------------|----------------------------------------------------------|
|                                            |    |             |             |      |          |   |          |          |      |                                              | common and Roma tomatoes.                                |
| Apple                                      | 25 | 4.56 (3, 4) | 1.24 (3, 4) | 3.32 | 0.01 (5) | 0 | 0        | 0.77 (4) | 4.10 | Enzymatic analyses and HPLC and ELSD         |                                                          |
| Cordial fruit drink red                    | 20 | 0.8 (6)     | 0.7 (6)     | 0.1  | 0        | 0 | 0        | 0        | 0.1  |                                              |                                                          |
| Cucumber                                   | 18 | 0.8 (2)     | 2.33        | 0    | 0        | 0 | 0        | 0        | 0    | GC                                           |                                                          |
| Soft drink non-carbonized                  | 17 | 0.4 (6)     | 0.3 (6)     | 0.1  | 0        | 0 | 0        | 0        | 0.1  |                                              | Fructose value counted by raw material and recipe by THL |
| Whole grain ryebread 7 % fiber (Kornelle)  | 15 | 1.22 (2)    | 0.94 (2)    | 0.28 | 1 (7)    | 0 | 0.33 (8) | 0.16 (8) | 1.87 | GC, Enzymatic, HPLC                          | Fructan, mean of bread types M to T in ref. 7            |
| <b>Fructan</b>                             |    |             |             |      |          |   |          |          |      |                                              |                                                          |
| Banana                                     | 35 | 2.6 (3, 4)  | 4.4 (4)     | 0    | 0.5 (5)  | 0 | 0        | 0        | 0.5  | Enzymes, HPLC with ELSD, ion chromatographic | Mean value ripe and firm                                 |
| Wheat pasta                                | 29 | 0.01 (2)    | 0           | 0    | 0.34 (8) | 0 | 0        | 0        | 0.34 | Enzymatic                                    |                                                          |
| Tomato                                     | 27 | 1.4 (2)     | 1.4 (2)     | 0    | 0.09 (4) | 0 | 0        | 0        | 0.09 | GC, HPLC with ELSD                           | Mean value of common and Roma tomatoes.                  |
| Whole grain rye bread 7 % fiber (Kornelle) | 15 | 1.22 (2)    | 0.94 (2)    | 0.28 | 1 (7)    | 0 | 0.33 (8) | 0.16 (8) | 1.87 | Enzymatic, HPLC                              | Fructan, mean of bread types M to T in ref. 7            |
| Orange                                     | 14 | 2.29 (3, 4) | 3.28        | 0    | 0.03 (5) | 0 | 0        | 0        | 0.03 | Ion Chromatography                           |                                                          |

|                                          |    |             |          |      |          |          |          |          |      |                               |                                                        |
|------------------------------------------|----|-------------|----------|------|----------|----------|----------|----------|------|-------------------------------|--------------------------------------------------------|
| Onion                                    | 11 | 1 (2)       | 1.95 (2) | 0    | 6.3 (10) | 0        | 0        | 0        | 6.3  | GC, enzymatic                 | Onion bulb. that is most common used in Sweden         |
| Pizza Capricciosa                        | 8  | 1.03        | 0.93     | 0.1  | 0.33     | 0        | 0        | 0.29     | 0.72 |                               | Calculated by recipe from National Swedish Food Agency |
| Lasagna                                  | 8  | 0.05        | 0.1      | 0    | 0.28     | 2.1      | 0        | 0        | 2.38 |                               | Calculated by recipe from National Swedish Food Agency |
| Whole grain rye bread 9 % (Rallarhalvor) | 8  | 1.22 (2)    | 0.94 (2) | 0.28 | 1.14 (9) | 0        | 0.33 (8) | 0.16 (8) | 1.91 | GC, enzymatic, HPLC with ELSD |                                                        |
| Clementine                               | 7  | 2.29 (3, 4) | 3.28     | 0    | 0.03 (5) | 0        | 0        | 0        | 0.03 | Ion Chromatography            | Values for orange                                      |
| <b>Lactose</b>                           |    |             |          |      |          |          |          |          |      |                               |                                                        |
| Medium fat milk 1.5 %                    | 90 | 0           | 0        | 0    | 0        | 4.9 (10) | 0        | 0        | 4.9  | Chromatographic               |                                                        |
| Sour milk fat 3%                         | 34 | 0           | 0        | 0    | 0        | 3.8 (10) | 0        | 0        | 3.8  | Chromatographic               |                                                        |
| Milk fat 3% Skim milk fat 0.5%           | 23 | 0           | 0        | 0    | 0        | 4.9 (10) | 0        | 0        | 4.9  | Chromatographic               |                                                        |
| Enriched with vitamin A and D.           | 17 | 0           | 0        | 0    | 0        | 5 (10)   | 0        | 0        | 5    | Chromatographic               |                                                        |
| Plain yoghurt fat 3%                     | 15 | 0           | 0        | 0    | 0        | 2.7 (10) | 0        | 0        | 2.7  | Chromatographic               |                                                        |

|                                               |    |          |          |      |           |          |          |          |      |                                  |                                               |
|-----------------------------------------------|----|----------|----------|------|-----------|----------|----------|----------|------|----------------------------------|-----------------------------------------------|
| Fruit yoghurt 2 %                             | 11 | 1.1 (2)  | 1.2 (2)  | 0    | 0         | 4.1 (10) | 0        | 0        | 4.1  | GC, Chromatographic              |                                               |
| Medium fat sour milk 1.5%                     | 11 | 0        | 0        | 0    | 0         | 3.8 (10) | 0        | 0        | 3.8  | Chromatographic                  |                                               |
| Low fat fruit yoghurt 0.5 %                   | 9  | 1.1 (2)  | 1.2 (2)  | 0    | 0         | 2.2 (10) | 0        | 0        | 2.2  | GC, Chromatographic              |                                               |
| Lasagna                                       | 8  | 0.05     | 0.1      | 0    | 0.28      | 2.1      | 0        | 0        | 2.38 |                                  | Calculated by recipe from SNFA                |
| Mashed potatoes homemade                      | 7  | 0.13     | 0.18     | 0    | 0         | 1.14     | 0        | 0        | 1.14 |                                  | Calculated by recipe from SFNA                |
| <b>GOS</b>                                    |    |          |          |      |           |          |          |          |      |                                  |                                               |
| Whole grain rye bread 7 % fiber (Kornelle)    | 15 | 1.22 (2) | 0.94 (2) | 0.28 | 1.14 (9)  | 0        | 0.33 (8) | 0.16 (8) | 1.91 | GC, Enzymatic and HPLC with ELSD |                                               |
| Onions                                        | 11 | 1.38 (2) | 1.95 (2) | 0    | 6.3 (3)   | 0        | 0        | 0        | 6.3  | GC, enzymatic                    |                                               |
| Whole grain rye bread 9% fiber (Rallarhalvor) | 5  | 1.22 (2) | 0.94 (2) | 0.28 | 1.14 (9)  | 0        | 0.33 (8) | 0.16 (8) | 1.91 | GC, enzymatic and HPLC with ELSD |                                               |
| Pancakes homemade                             | 5  | 0        | 0        | 0    | 0.51      | 2.4      | 0        | 0        | 2.91 |                                  | Calculated by recipe from SNFA                |
| White bread fiber 5 %                         | 5  | 0.27 (2) | 0        | 0.27 | 1.02 (11) | 0        | 0.2 (8)  | 0        | 1.49 | GC, enzymatic HPLC with ELSD     |                                               |
| Whole grain rye bread 6% fiber (Lingongrova,  | 4  | 4.44 (2) | 3.42 (2) | 1.02 | 1 (7)     | 0        | 0.33 (8) | 0.16 (8) | 2.61 | Enzymatic and HPLC               | Fructan, mean of bread types M to T in ref. 7 |

|                                                  |    |                 |          |      |              |   |          |          |      |                                        |                                                                                                                              |  |
|--------------------------------------------------|----|-----------------|----------|------|--------------|---|----------|----------|------|----------------------------------------|------------------------------------------------------------------------------------------------------------------------------|--|
| Skördeglädje,<br>Gott gräddat)                   |    |                 |          |      |              |   |          |          |      |                                        |                                                                                                                              |  |
| Hamburger<br>bread                               | 4  | 0.27 (2)        | 0        | 0.27 | 1.02 (11)    | 0 | 0.2 (8)  | 0        | 1.49 |                                        |                                                                                                                              |  |
| Whole meal<br>white bread                        |    |                 |          |      |              |   |          |          |      | GC, enzymatic<br>and HPLC with<br>ELSD | Mean of bread whole meal<br>sliced, pitta whole meal ref.<br>11 and wheat whole meal<br>and wheat whole grain from<br>ref. 8 |  |
| baguette<br>sourdough 4.4%<br>fiber. Bake off.   | 4  | 0.27 (2)        | 0        | 0.27 | 0.79 (8, 11) | 0 | 0.57 (8) | 0        | 1.63 |                                        |                                                                                                                              |  |
| Wheat whole<br>meal bread 6%<br>fiber            | 4  | 0.27 (2)        | 0        | 0.27 | 0.79 (8, 11) | 0 | 0.57 (8) | 0        | 1.63 | GC, enzymatic<br>and HPLC with<br>ELSD | Mean of bread whole meal<br>sliced, pitta whole meal<br>ref. 11 and wheat whole<br>meal and wheat whole<br>grain from ref. 8 |  |
| Yellow split pea<br>soup                         | 4  | 0.04            |          |      | 0.73         | 0 | 0.73     | 0        | 0.73 |                                        | Calculated by recipe from<br>SNFA                                                                                            |  |
| <b>Polyols</b>                                   |    |                 |          |      |              |   |          |          |      |                                        |                                                                                                                              |  |
| Apple                                            | 25 | 4.56 (3,<br>4)) | 1.24 (4) | 3.32 | 0.01 (5)     | 0 | 0        | 0.77 (4) | 4.1  | Enzymatic and<br>HPLC with<br>ELSD     | Five types of apples,<br>peeled and unpeeled                                                                                 |  |
| Whole grain rye<br>bread fiber 7 %<br>(Kornelle) | 15 | 1.22 (2)        | 0.94 (2) | 0.28 | 1 (7)        | 0 | 0.33 (8) | 0.16 (8) | 1.87 | Enzymatic and<br>HPLC                  | Fructan, mean of bread<br>types M to T in ref. 7                                                                             |  |
| Pear                                             | 10 | 6.36 (3,<br>4)  | 2.73 (4) | 3.63 | 0            | 0 | 0        | 4.1 (4)  | 7.73 | Enzymatic and<br>HPLC with<br>ELSD     | Two types of pear, mean<br>ripe and firm                                                                                     |  |

|                                                |   |          |          |      |          |   |          |          |      |                                  |                                               |
|------------------------------------------------|---|----------|----------|------|----------|---|----------|----------|------|----------------------------------|-----------------------------------------------|
| Pizza Capricciosa                              | 8 | 1.03     | 0.93     | 0.1  | 0.33     | 0 | 0        | 0.29     | 0.72 |                                  | Calculated by recipe from SNFA                |
| Whole grain rye bread fiber 9 % (Rallarhalvor) | 8 | 1.22 (2) | 0.94 (2) | 0.28 | 1.14 (9) | 0 | 0.33 (8) | 0.16 (8) | 1.91 | GC, enzymatic and HPLC with ELSD |                                               |
| Bell peppers yellow, green, red                | 7 | 2.8 (4)  | 4.33 (4) | 0    | 0        | 0 | 0        | 0.37 (4) | 0.37 | Enzymatic and HPLC with ELSD     |                                               |
| Avocado                                        | 6 | 0.15(4)  | 0.69 (4) | 0    | 0        | 0 | 0        | 0.65 (4) | 0.65 | HPLC with ELSD                   |                                               |
| Corn. canned without juice                     | 5 | 0.18 (4) | 0.79 (4) | 0    | 0        | 0 | 0        | 0.45 (4) | 0.45 | HPLC with ELSD                   |                                               |
| Whole grain rye bread fiber 6 % (Lingongrova)  | 4 | 4.44 (2) | 3.42 (2) | 1.02 | 1 (7)    | 0 | 0.33 (8) | 0.16 (8) | 2.61 | GC, enzymatic and HPLC with ELSD | Fructan, mean of bread types M to T in ref. 7 |
| Nectarines                                     | 4 | 0.62 (4) | 1.49 (4) | 0    | 0.59 (4) | 0 |          | 1.01 (4) | 1.6  | HPLC with ELSD                   |                                               |

Galacto- oligosaccharides GOS

Gas-chromatography (GC)

National Institute for Health and Welfare in Finland (THL).

High performance Liquid Chromatography (HPLC)

Evaporative light scattering detection (ELSD)

Swedish National Food Agency (SNFA)

**Supplementary Table 2. Lists present the 20 food items with the highest content of fructose in g per 100 g food item from the extended database.**

Fructose in excess of glucose is 0 if glucose content is higher than the fructose content.

| Food items                                   | Fructose/100g food item | Glucose/100g food item | Excess fructose/100 g food item | Analytical method       | Reference | Comment                                       |
|----------------------------------------------|-------------------------|------------------------|---------------------------------|-------------------------|-----------|-----------------------------------------------|
| Honey                                        | 38.5                    | 32                     | 6.5                             | Chromatographic analyze | (1)       |                                               |
| Raisins                                      | 29                      | 29.5                   | 0                               | Chromatographic analyze | (1)       |                                               |
| Figs dried                                   | 26.5                    | 30                     | 0                               | Chromatographic analyze | (1)       |                                               |
| Dates dried                                  | 21.6                    | 27.2                   | 0                               | Chromatographic analyze | (1)       |                                               |
| Wafers filled biscuits                       | 21.1                    | 22.2                   | 0                               | HPLC with ELSD          | (8)       |                                               |
| Biscuits Singoalla type                      | 21.1                    | 22.2                   | 0                               | HPLC with ELSD          | (8)       |                                               |
| Filled biscuits                              | 21.1                    | 22.2                   | 0                               | HPLC with ELSD          | (8)       |                                               |
| Cereals gluten free with fruit               | 16.8                    | 19                     | 0                               | HPLC with ELSD          | (8)       |                                               |
| Preserve, orange                             | 15.3                    | 16.3                   | 0                               | Chromatographic analyze | (1)       |                                               |
| Preserve, apricot, strawberry and blackberry | 14.7                    | 12.9                   | 1.8                             |                         | (6)       | Value counted from similar food item, by THL. |
| Prunes dried                                 | 14.6                    | 14.4                   | 0.2                             | GC                      | (1)       |                                               |
| Dried fruit and dried papaya                 | 13                      | 13.8                   | 0                               |                         | (6)       | Value counted from similar food item, by THL. |

|                                                 |      |      |     |                         |     |                                                  |
|-------------------------------------------------|------|------|-----|-------------------------|-----|--------------------------------------------------|
| Apple purée (light in sugar)                    | 12.7 | 9    | 3.7 | Chromatography          | (1) |                                                  |
| Apple purée                                     | 12.7 | 9    | 3.7 | Chromatographic analyze | (1) |                                                  |
| Sundried tomatoes                               | 12.6 | 10.3 | 2.3 | GC                      | (2) |                                                  |
| Muesli whole grain including fruit/berries/nuts | 12.6 | 16.1 | 0   | HPLC with ELSD          | (8) |                                                  |
| Lingon berry jam                                | 11.5 | 11.6 | 0   | Chromatographic analyze | (1) |                                                  |
| Deep fried onion                                | 11   | 11.7 | 0   |                         | (6) | Transferred value from similar food item by THL. |
| Cereals whole grain, seeds and raisins          | 9.5  | 9.6  | 0   | GC                      | (2) |                                                  |
| Fruit cocktail                                  | 9    | 7.4  | 1.6 | Chromatographic analyze | (1) |                                                  |

Gas-chromatography (GC)

High performance liquid chromatography (HPLC)

Evaporative light scattering detection (ELSD)

National Institute for Health and Welfare in Finland (THL)



**Supplementary Table 3. Lists present the 20 food items with the highest content of fructan in g per 100 g food item from the extended database.**

| Food items                                               | Fructan /100 g food item | Analytical method  | Reference | Comment                                                                 |
|----------------------------------------------------------|--------------------------|--------------------|-----------|-------------------------------------------------------------------------|
| Garlic                                                   | 17.40                    | Enzymatic analysis | (3)       |                                                                         |
| Jerusalem artichoke puré and boiled                      | 12.20                    | Enzymatic analysis | (3)       |                                                                         |
| Jerusalem artichoke                                      | 12.20                    | Enzymatic analysis | (3)       |                                                                         |
| Onion                                                    | 6.30                     | Enzymatic analysis | (3)       | Bulb                                                                    |
| Filled biscuits, Wafers                                  | 4.61                     | Enzymatic analysis | (8)       |                                                                         |
| Onion powder                                             | 4.50                     | HPLC               | (5)       | Value for onion powder. Only fructo-oligosaccharides with DP2, DP3, DP4 |
| Rye crisp bread (air-leavened), non-yeast                | 4.27                     | Enzymatic analysis | (9)       |                                                                         |
| Leek                                                     | 3.80                     | Enzymatic analysis | (3)       | Mean value leek whole and leek bulb                                     |
| Wheat bran                                               | 3.70                     | Enzymatic analysis | (12)      |                                                                         |
| Whole meal rye and crushed rye                           | 3.52                     | Enzymatic analysis | (9)       |                                                                         |
| Crisp Bread (yeast, sourdough)                           | 3.20                     | Enzymatic analysis | (9)       |                                                                         |
| Müsli, fiber, Energy bars e.g. Start, Allbran, Special K | 2.53                     | Enzymatic analysis | (8)       |                                                                         |
| Whole grain Cereals                                      | 2.35                     | Enzymatic analysis | (8)       |                                                                         |
| Semolina                                                 | 2.25                     | Enzymatic analysis | (12)      |                                                                         |
| Wheat germ                                               | 2.25                     | Enzymatic analysis | (12)      |                                                                         |
| Broken Wheat                                             | 2.16                     | Enzymatic analysis | (12)      |                                                                         |
| Cereals Weetabix type                                    | 2.05                     | Enzymatic analysis | (8)       |                                                                         |
| Bulgur                                                   | 2.00                     | Enzymatic analysis | (8)       | Value for couscous                                                      |
| Grahams flour                                            | 1.72                     | Enzymatic analysis | (12)      |                                                                         |
| Whole meal rye bread                                     | 1.14                     | Enzymatic analysis | (9)       |                                                                         |

High performance liquid chromatography (HPLC)  
Degree of polymerization (DP)

**Supplementary Table 4. Lists present the 20 food items with the highest content of lactose in g per 100 g food item from the extended database.**

| <b>Food items</b>                           | <b>Lactose<br/>/100 g food item</b> | <b>Analytical method</b> | <b>Reference</b> | <b>Comment</b>                                |
|---------------------------------------------|-------------------------------------|--------------------------|------------------|-----------------------------------------------|
| Whey cheese 49 % fat                        | 48                                  | HPLC                     | (13)             |                                               |
| Whey cheese butter type 5% fat              | 49                                  | HPLC                     | (13)             | Original whey cheese                          |
| Chocolate white                             | 10                                  | Chromatographic analyze  | (1)              |                                               |
| Milk chocolate with and without added sugar | 10                                  | Chromatographic analyze  | (1)              |                                               |
| Hollandaise sauce                           | 7.70                                |                          | (6)              | Counted by THL on raw material of the recipe  |
| Milk chocolate with nuts                    | 7.7                                 |                          | (6)              | Counted by THL on raw material of the recipe  |
| Chocolate cream                             | 7.50                                | Chromatographic analyze  | (1)              |                                               |
| Ice cream 8,10,12 % fat                     | 6.10                                | Chromatographic analyze  | (1)              |                                               |
| Dip                                         | 5.80                                |                          | (6)              | Counted by THL on raw material of the recipe. |
| Chocolate pudding, mousse                   | 5.70                                |                          | (6)              | Counted by THL on raw material of the recipe  |
| Chocolate pudding, mousse                   |                                     |                          |                  |                                               |
| Ice loll (cream based)                      | 5.20                                |                          | (6)              | Counted by THL on raw material of the recipe. |
| Skim milk < 0.1% fat                        | 5                                   | Chromatographic analyze  | (10)             |                                               |
| Skim milk 0.5% fat                          | 5                                   | Chromatographic analyze  | (10)             |                                               |
| Gratin, stew sauce                          | 4.9                                 |                          | (6)              | Counted by THL on raw material of the recipe  |
| Rice pudding (milk based)                   | 4.9                                 |                          | (6)              | Counted by THL on raw material of the recipe  |
| Milk 3 %                                    | 4.9                                 | Chromatographic analyze  | (10)             |                                               |

|                                |     |                         |      |                                                              |
|--------------------------------|-----|-------------------------|------|--------------------------------------------------------------|
| Medium fat milk 1.5%           | 4.9 | Chromatographic analyze | (10) | Calculated by recipe from<br>Swedish National Food<br>Agency |
| Chocolate milk drink (3 % fat) | 4.9 |                         |      |                                                              |
| Vanilla sauce                  | 4.6 |                         | (6)  | Counted by THL on raw<br>material of the recipe.             |

---

High performance liquid chromatography (HPLC)  
National Institute for Health and Welfare in Finland (THL)

**Supplementary Table 5. Lists present the 20 food items with the highest content of GOS in g per 100 g food item from the extended database.**

| <b>Food item</b>                            | <b>GOS/ 100g food item</b> | <b>Analytical method</b> | <b>Reference</b> | <b>Comment</b>                                                                    |
|---------------------------------------------|----------------------------|--------------------------|------------------|-----------------------------------------------------------------------------------|
| Green peas                                  | 1.88                       | HPLC with ELSD           | (8)              |                                                                                   |
| Brown beans                                 | 1.44                       | HPLC with ELSD           | (8)              | Value for kidney beans, same plant family                                         |
| Kidney beans, red beans                     | 1.44                       | HPLC with ELSD           | (8)              |                                                                                   |
| White beans                                 | 1.44                       | HPLC with ELSD           | (8)              | Value for kidney beans, same plant family                                         |
| Cereals whole grain 4 types (All bran type) | 1.32                       | HPLC with ELSD           | (8)              |                                                                                   |
| Soy flour                                   | 0.79                       | HPLC with ELSD           | (8)              | Value for soy bean                                                                |
| Soy bean                                    | 0.79                       | HPLC with ELSD           | (8)              |                                                                                   |
| Vegetarian soya beef                        | 0.79                       | HPLC with ELSD           | (8)              | Calculated by recipe using value for soy been                                     |
| Miso                                        | 0.79                       | HPLC with ELSD           | (8)              | Calculated by recipe using value for soy been                                     |
| Pea soup                                    | 0.73                       | HPLC with ELSD           | (8)              | Calculated by recipe using recipe from Swedish National Food Agency               |
| Vegetarian minced soy protein               | 0.67                       | HPLC with ELSD           | (8)              | Calculated by recipe using value for soy been                                     |
| Crisp bread wheat and rye based             | 0.59                       | HPLC with ELSD           | (8)              | Value for whole grain bread, wheat based bread, added rye flour and kibbled grain |
| Sweet almond                                | 0.58                       | HPLC with ELSD           | (8)              | Value for LSA mix                                                                 |
| Sunflower seeds                             | 0.58                       | HPLC with ELSD           | (8)              | Value for LSA mix                                                                 |
| Linseed                                     | 0.58                       | HPLC with ELSD           | (8)              | Value for LSA mix                                                                 |
| Whole meal wheat bread fiber 6%             | 0.57                       | HPLC with ELSD           | (8)              |                                                                                   |
| Whole meal wheat bread fiber 13%            | 0.57                       | HPLC with ELSD           | (8)              |                                                                                   |
| Lentils red boiled                          | 0.46                       | HPLC with ELSD           | (8)              |                                                                                   |

|                           |      |                |     |
|---------------------------|------|----------------|-----|
| Lentils green boiled      | 0.46 | HPLC with ELSD | (8) |
| White dried beans, boiled | 0.42 | HPLC with ELSD | (8) |

---

High performance liquid chromatography (HPLC)

Evaporative light scattering detection (ELSD)

Linseed, almond, sunflower mix (LSA)

**Supplementary Table 6. Lists present the 20 food items with the highest content of polyols in g per 100 g food item from the extended database.**

| Food items                  | Polyols/100 g food item | Analytical method | Reference | Comment                                                                                                       |
|-----------------------------|-------------------------|-------------------|-----------|---------------------------------------------------------------------------------------------------------------|
| Cough drops sugar free      | 97                      |                   | (14)      | Isomalt. Calculated by recipe                                                                                 |
| Chewing gum                 | 41.90                   | HPLC with ELSD    | (15)      | Sorbitol                                                                                                      |
| Prunes                      | 10.80                   | HPLC with ELSD    | (15)      | Sorbitol                                                                                                      |
| Dried apricot               | 6.0                     | HPLC with ELSD    | (15)      | Sorbitol                                                                                                      |
| Blackberry fresh and frozen | 4.76                    | HPLC with ELSD    | (4)       | Sorbitol                                                                                                      |
| Pear                        | 4.10                    | HPLC with ELSD    | (4)       | Sorbitol. Mean value firm and ripe                                                                            |
| Pear nectar                 | 3.40                    |                   | (16)      | Calculated using Australian analytical values for raw, unpeeled pear. (1986) Composition of Australian foods. |
| Cauliflower                 | 2.96                    | HPLC with ELSD    | (4)       | Mannitol                                                                                                      |
| Mushrooms                   | 2.74                    | HPLC with ELSD    | (4)       | Sorbitol and mannitol                                                                                         |
| Plum                        | 2.40                    | HPLC with ELSD    | (15)      | Sorbitol                                                                                                      |
| Apples dried                | 1.90                    | HPLC with ELSD    | (15)      | Sorbitol                                                                                                      |
| Celery                      | 1.50                    | HPLC with ELSD    | (15)      | Mannitol                                                                                                      |
| Apricot                     | 1.20                    | HPLC with ELSD    | (15)      | Sorbitol                                                                                                      |
| Canned apricot              | 1.20                    | HPLC with ELSD    | (15)      | Sorbitol. Value for apricot                                                                                   |
| Crepes with mushroom        | 1.20                    |                   |           | Calculated by recipe from Swedish National Food Agency                                                        |
| Snow peas                   | 1.16                    | HPLC with ELSD    | (4)       | Mannitol                                                                                                      |
| Peach                       | 1.03                    | HPLC with ELSD    | (4)       | Sorbitol and Mannitol. Mean of tree kinds of peaches                                                          |
| Nectarine                   | 1.01                    | HPLC with ELSD    | (4)       | Sorbitol                                                                                                      |
| Cherries canned in syrup    | 1                       |                   | (16)      | Sorbitol                                                                                                      |
|                             |                         |                   |           | These data were derived using a recipe approach                                                               |
| Muesli gluten free          | 0.89                    | HPLC with ELSD    | (8)       | Sorbitol                                                                                                      |

High Performance Liquid Chromatography (HPLC)  
Evaporative Light Scattering Detection (ELSD)

## References

1. Carbohydrate table: Swedish National Food Agency 1996.
2. Swedish National Food Agency; Available from: <http://www.slv.se/>
3. Muir JG, Shepherd SJ, Rosella O, Rose R, Barrett JS, Gibson PR. Fructan and free fructose content of common Australian vegetables and fruit. *Journal of Agricultural and Food Chemistry*. [Research Support, Non-U.S. Gov't]. 2007 Aug 8;55(16):6619-27.
4. Muir JG, Rose R, Rosella O, Liels K, Barrett JS, Shepherd SJ, et al. Measurement of short-chain carbohydrates in common Australian vegetables and fruits by high-performance liquid chromatography (HPLC). *Journal of Agricultural and Food Chemistry*. [Evaluation Studies Research Support, Non-U.S. Gov't]. 2009 Jan 28;57(2):554-65.
5. Campbell JM, Bauer LL, Fahey GC, Hogarth AJCL, Wolf BW, Hunter DE. Selected Fructooligosaccharide (1-Kestose, Nystose, and 1F- $\beta$ -Fructofuranosylnystose) Composition of Foods and Feeds. *Journal of Agricultural and Food Chemistry* 1997;45(8):3076-82.
6. Available from: <http://www.fineli.fi>
7. Rakha A, Åman P, Andersson R. Characterisation of dietary fibre components in rye products. *Food chem*. 2009;119:859-67.
8. Biesiekierski JR, Rosella O, Rose R, Liels K, Barrett JS, Shepherd SJ, et al. Quantification of fructans, galacto-oligosaccharides and other short-chain carbohydrates in processed grains and cereals. *J Hum Nutr Diet*. 2011 Apr;24(2):154-76.
9. Andersson R, Fransson G, Tietjen M, Åman P. Content and Molecular-Weight Distribution of Dietary Fiber Components in Whole-Grain Rye Flour and Bread. *Journal of Agricultural and Food Chemistry*. 2009 2009/03/11;57(5):2004-8.
10. ARLA. [2015-09-15]; Available from: <http://www.arla.se/>
11. Whelan K, Abrahamsohn O, David GJ, Staudacher H, Irving P, Lomer MC, et al. Fructan content of commonly consumed wheat, rye and gluten-free breads. *Int J Food Sci Nutr*. [Research Support, Non-U.S. Gov't]. 2011 Aug;62(5):498-503.
12. Haskå L, Nyman M, Andersson R. Distribution and Characterisation of fructan in wheat milling fractions. *Journal of Cereal Science*. 2008;48:768-74.
13. Fjällbrynt. [2015-09-15]; Available from: <http://www.fjallbrynt.se/produkter/messmor-natur/>
14. CLOETTA. [2015-09-15]; Available from: <http://www.cloetta.se/varumarken-och-produkter/lakerol/>
15. Yao CK, Tan HL, van Langenberg DR, Barrett JS, Rose R, Liels K, et al. Dietary sorbitol and mannitol: food content and distinct absorption patterns between healthy individuals and patients with irritable bowel syndrome. *J Hum Nutr Diet*. [Randomized Controlled Trial]. 2014 Apr;27 Suppl 2:263-75.
16. NUTTAB. Available from: <http://www.foodstandards.gov.au/consumerinformation/nuttab2010/>
